# Supplementary material for: All-polymer solar cells with 19% efficiency via introducing pincer-shaped non-covalent bond interactions
Source: Royal Society of Chemistry journal article supplement (doi:10.1039/d4ee01117a), 2024-01-01
Supplement: d4ee01117a1.pdf [file d4ee01117a1.pdf]

## Supplementary Information

### 19% Efficiency All-Polymer Solar Cells via Introducing Pincer-Shaped Non-covalent Bond Interactions

Jianxiao Wang,<sup>a,b,c</sup> Yonghai Li,<sup>a,b,c</sup> Chenyu Han,<sup>a</sup> Liangliang Chen,<sup>d</sup> Fuzhen Bi,<sup>a,b,c</sup> Zunyuan Hu,<sup>a</sup> Chunming Yang,<sup>e</sup> Xichang Bao\*<sup>a,b,c</sup> and Junhao Chu<sup>a,b,c</sup>

<sup>a</sup> Key Laboratory of Photoelectric Conversion and Utilization of Solar Energy, Qingdao Institute of Bioenergy and Bioprocess Technology, Chinese Academy of Sciences

Qingdao 266101, China

E-mail: [baoxc@qibebt.ac.cn](mailto:baoxc@qibebt.ac.cn)

<sup>b</sup> Functional Laboratory of Solar Energy, Shandong Energy Institute

Qingdao 266101, China

<sup>c</sup> Qingdao New Energy Shandong Laboratory

Qingdao 266101, China

<sup>d</sup> Beijing National Laboratory for Molecular Sciences, CAS Key Laboratory of Organic Solids, Institute of Chemistry, Chinese Academy of Sciences

Beijing 100190, China

<sup>e</sup> Shanghai Synchrotron Radiation Facility Shanghai Advanced Research Institute Chinese Academy of Sciences

Shanghai 201204, China

## 1. Synthesis of small molecules

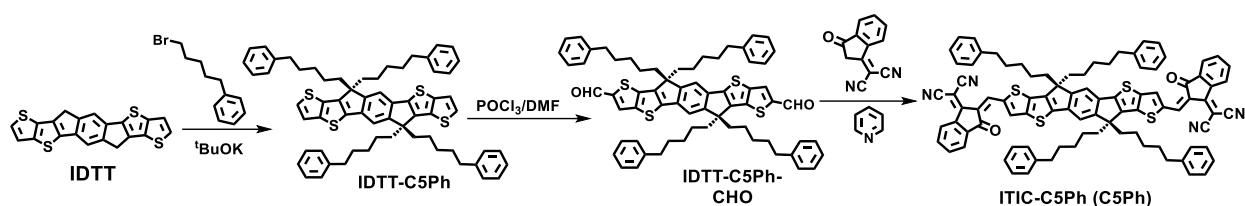

**Scheme S1.** The synthetic routes of C5Ph molecule.

C6Ph was synthesized according to our previous literature (Adv. Mater. 2023, 35, 2208986). The synthetic route of C5Ph is shown in **Scheme 1**. Detailed synthetic procedures are shown below:

**Synthesis of IDTT-C5Ph:** In a 100 mL flash, indacenodithienothiophene (IDTT) (400 mg, 1.06 mmol) and 1-Bromo-5-phenylpentane (1.92 g, 8.45 mmol) were dissolved into 20 mL anhydrous THF. The <sup>t</sup>BuOK (948.6 mg, 8.45 mmol) was added slowly in batches. After stirring at room temperature for an additional 2 hours, the reaction mixture was extracted with dichloromethane three times and the collected organic layers were distilled under reduced pressure. The residue was purified by silica gel column chromatography to afford off-white powder. (Yield: 63%)

<sup>1</sup>H NMR (600 MHz, Chloroform-*d*) δ 7.38 – 7.34 (m, 4H), 7.18 (t, *J* = 7.5 Hz, 8H), 7.11 (t, *J* = 7.3 Hz, 4H), 6.99 (d, *J* = 7.4 Hz, 8H), 2.37 (t, *J* = 7.7 Hz, 8H), 2.13 (td, *J* = 12.5, 4.9 Hz, 4H), 2.04 – 1.95 (m, 4H), 1.39 (p, *J* = 7.0 Hz, 8H), 1.12 (q, *J* = 7.6 Hz, 8H), 0.83 (tt, *J* = 11.8, 6.1 Hz, 8H). <sup>13</sup>C NMR (151 MHz, Chloroform-*d*) δ 152.22, 145.36, 143.68, 142.60, 141.40, 136.60, 133.51, 128.32, 128.09, 125.48, 125.42, 120.57, 112.97, 54.11, 38.27, 35.60, 30.91, 29.70, 29.24, 23.77.

**Synthesis of IDTT-C5Ph-CHO:** N, N-dimethylformamide (DMF) (1 mL) was added to 1,2-dichloroethane (1 mL) under argon atmosphere, then POCl<sub>3</sub> (1.5 mL) was added dropwise at 0 °C and stirred for another 2 hours. Then IDTT-C5Ph (170 mg, 0.18 mmol) dissolved in 1,2-dichloroethane (10 mL) was dropped and refluxed for 48 hours. The mixture cooled to room temperature and poured into ice water stirred for another 4 hours. Then the mixture was extracted with dichloromethane for three times and removed solvent under vacuum. The crude product was purified on silica gel column chromatography to give orange oil. (Yield: 68%)

<sup>1</sup>H NMR (600 MHz, Chloroform-*d*) δ 9.97 (s, 2H), 8.02 (s, 2H), 7.41 (s, 2H), 7.16 (t, *J* = 7.5 Hz, 8H), 7.10 (t, *J* = 7.3 Hz, 4H), 6.98 – 6.96 (m, 8H), 2.35 (t, *J* = 7.6 Hz, 8H), 2.16 – 2.10 (m, 4H), 2.01 (ddd, *J* = 13.6, 11.3, 5.1 Hz, 4H), 1.36 (dt, *J* = 14.1, 7.2 Hz, 8H), 1.14 – 1.09 (m, 8H), 0.77 (dddd, *J* = 16.4, 13.0, 6.7, 3.8 Hz, 8H). <sup>13</sup>C NMR (151 MHz, Chloroform-*d*) δ 182.81, 153.66, 150.25, 145.94, 143.87, 142.37, 141.67, 139.85, 137.02, 130.22, 128.28, 128.14, 125.54, 114.18, 54.49, 38.12, 35.59, 30.89, 29.16, 23.90.

**Synthesis of C5Ph:** IDTT-C5Ph-CHO (150 mg, 0.15 mmol) and 2-(3-oxo-2,3-dihydro-1H-inden-1-ylidene)malononitrile (200 mg, 1.03 mmol) were dissolved in 20 mL degassed chloroform. Then pyridine (1 mL) was added and the mixture was refluxed for 2.5 hours. After cooling to room temperature, the mixture was poured into methane and filtered. The residue was purified by silica gel column chromatography, yielding a blue solid. (Yield: 76%)  $^1\text{H}$  NMR (600 MHz, Chloroform- $d$ )  $\delta$  8.91 (s, 2H), 8.65 (d, 2H), 8.14 (s, 2H), 7.89 (d, 2H), 7.74 – 7.68 (m, 4H), 7.40 (s, 2H), 7.06 (t,  $J = 7.4$  Hz, 8H), 6.99 (t,  $J = 7.4$  Hz, 4H), 6.91 – 6.85 (m, 8H), 2.27 (t,  $J = 7.7$  Hz, 8H), 2.21 – 2.15 (m, 4H), 2.01 (dt,  $J = 13.7, 8.7$  Hz, 4H), 1.29 (pd,  $J = 7.1, 2.7$  Hz, 8H), 1.09 – 1.04 (m, 8H), 0.74 – 0.68 (m, 8H).

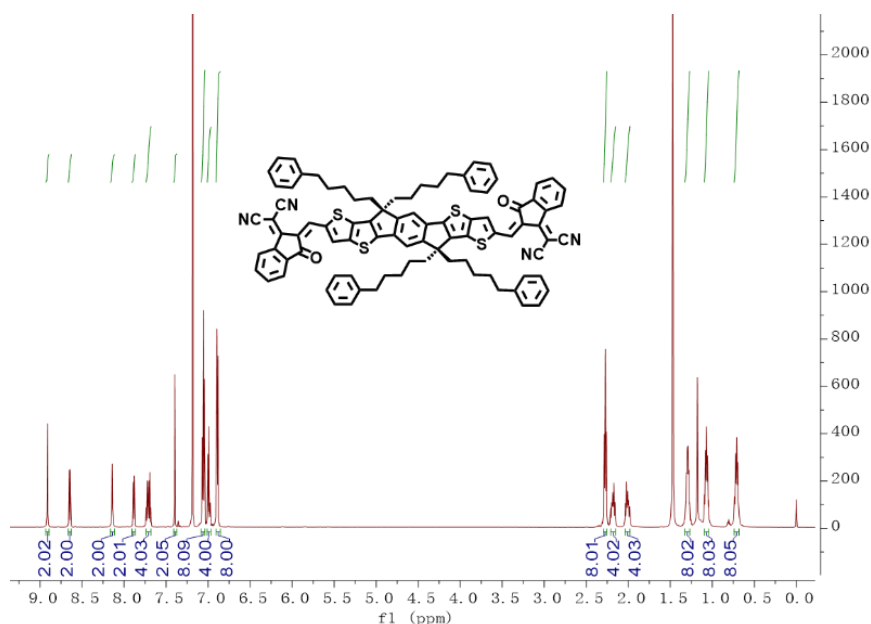

## 2. Details of single crystal cultivation

The small molecule C5Ph was dissolved in chloroform ( $\sim 1\text{mg/mL}$ , 8 mg) and sealed in a small vial (volume: 15 mL) by aluminium-foil paper. Then several (4~6) pinholes were made on the foil paper by fine needle and put the small vial into a large-sized vial (volume: 50 mL), which contains 10 mL  $\text{CH}_3\text{OH}$ . Finally, the large-sized vial was tightly sealed and put into a quiet and dark place at room temperature for 5~7 days to culture the single crystals.

The crystal structure of C6Ph was extracted from our previous report. (Adv. Mater. 2023, 35, 2208986)

### 3. Device fabrication and evaluations

#### 3.1 Device fabrication of rigid solar cells

The polymer donors PBQx-TF, PM6, and polymer acceptor PY-IT were purchased from Solarmer Materials Inc. The Molecular weights and PDIs were measured based on high temperature gel permeation chromatography measurements (trichlorobenzene, 150 °C). PBQx-TF, GPC: Mn= 38.6 kDa, Mw=72.3 kDa, PDI=1.87; PM6, GPC: Mn= 38.4 kDa, Mw=92.2 kDa, PDI=2.39; PY-IT, GPC: Mn= 7.3 kDa, Mw=13.1 kDa, PDI=1.78.

All the rigid solar cells were fabricated with a conventional device structure of Glass/ITO/PEDOT:PSS/active layer/PDINN/Ag. The patterned ITO glass (sheet resistance ~15 Ω/ square) was pre-cleaned in an ultrasonic bath of acetone and isopropyl alcohol and treated by Plasma for 100 s. Then a thin layer (about 25 nm) of PEDOT:PSS was spin-coated onto the ITO glass at 4000 rpm and baked at 150 °C for 15 min.

Active materials: PBQx-TF, PM6 and PY-IT were purchased from Solarmer-materials Co.

For the fabrication of bulk heterojunction (**BHJ**) APSCs, PBQx-TF:PY-IT based all-polymer solutions (PBQx-TF concentration: 5.3 mg/ml in Toluene) with 1.8 vol% 1-chloronaphthalene (CN) were stirred for 2.5 hrs at 85 °C before spin-coating on the PEDOT:PSS layer to form the thin active layer about 110±20 nm. PM6:PY-IT based all-polymer solutions (PM6 concentration: 6.8 mg/ml in chloroform) with 1.8 vol% 1-chloronaphthalene (CN) were stirred for 2.5 hrs at 50 °C before spin-coating on the PEDOT:PSS layer to form the thin active layer about 110±20 nm. The thickness of the thick active layer was measured using a Veeco Dektak 150 profilometer. Then PDINN (in CH<sub>3</sub>OH, 1mg/mL) was spin-coating at 3000 rpm to form the electron transfer layer. Finally, Ag (100 nm) metal electrode was thermal evaporated under about 5×10<sup>-5</sup> Pa and the device area was 0.0936 cm<sup>2</sup> defined by shadow mask.

For the fabrication of pseudo-planar heterojunction (**PPHJ**) APSCs, the donor(s) solutions in Toluene (PBQx-TF concentration: 5.5 mg/ml) were stirred for 2.5 hrs at 85 °C before spin-coating on the PEDOT:PSS layer to form the bottom layers about 65±10 nm. the acceptor top solutions in chloroform (PY-IT concentration: 7 mg/ml) with 1.8 vol% 1-chloronaphthalene (CN) were stirred for 2.5 hrs at 50 °C before spin-coating on donor layers to form the acceptor layers about 40±10 nm. Then PDINN (in CH<sub>3</sub>OH, 1mg/mL) was spin-coating at 3000 rpm to form the electron transfer layer. Finally, Ag (100 nm) metal electrode was thermal evaporated under about 5×10<sup>-5</sup> Pa and the device area was 0.0936 cm<sup>2</sup> defined by shadow mask.

#### 3.2 Device fabrication of flexible solar cells

All the flexible solar cells were fabricated with a conventional device structure of PET/ITO(AgNWs)/PEDOT:PSS/active layer/PDINO/Al. Prepare flexible samples by sticking them onto a rigid

glass substrate to prevent device deformation from affecting film quality. The patterned ITO glass (sheet resistance  $\sim 15 \Omega/\text{square}$ ) was pre-cleaned in an ultrasonic bath of acetone and isopropyl alcohol and treated by Plasma for 60 s. Then a thin layer (about 25 nm) of PEDOT:PSS was spin-coated onto the ITO glass at 4000 rpm and baked at 100 °C for 20 min. The preparation of the active layer is the same as that of rigid devices. Then PDINN (in  $\text{CH}_3\text{OH}$ , 1mg/mL) was spin-coating at 3000 rpm to form the electron transfer layer. Finally, Al (100 nm) metal electrode was thermal evaporated under about  $5 \times 10^{-5}$  Pa.

#### 4. Instruments and characterizations

The current density-voltage ( $J$ - $V$ ) curves of all the polymer solar cells (OPVs) were measured by a Keithley 2400 unit in high-purity nitrogen-filled glove box ( $\text{H}_2\text{O} < 0.1$  PPM;  $\text{O}_2 < 0.1$  PPM). The AM 1.5G irradiation was provided by an XES-40S2 (SAN-EI ELECTRIC Co., Ltd) solar simulator (AAA grade,  $70 \times 70 \text{ mm}^2$  photobeam size) with light intensity of  $100 \text{ mW cm}^{-2}$ . The solar simulator is calibrated by standard silicon cell (SRC-00178) before device testing. The standard silicon cell was last certified in September 2022. The dark current test is in an opaque box. The  $J$ - $V$  curves were measured in forward scan mode (from -0.2 V to 1.2 V) with a scan step length of 0.02 V and dwell time of 50 ms. The pre sweep delay is 0.5 s.

The external quantum efficiency (EQE) spectra of OPVs were measured by a Zolix Solar Cell Scan 100. The light intensity at each wavelength was also calibrated with a standard silicon solar cell (RCS103011-E) before EQE spectra test. The EQE spectra are tested in an air environment without any packaging.

The absorption spectra of films were measured with a PERSEE TU-1810 PC spectrometer. Spin the prepared solution on the Plasma treated quartz wafer by spin coating, and the treatment method is consistent with the device.

The AFM were measured by Agilent 5400 AFM. Spin the prepared solution onto the glass substrate with PEDOT:PSS to prepare the test samples. The films treatment method is the same as that of the devices.

The hole mobility and electron mobility were measured by space-charge-limited current (SCLC) method with a device configuration of ITO/PEDOT:PSS/active layer/ $\text{MoO}_3$ /Ag and ITO/ $\text{ZnO}$ /active layer/PDINN/Ag structure.

The theoretical simulations and calculations of interactions were conducted by Gaussian 09 based on B3LYPD3/def2-SVP level of theory.

GIWAXS were measured at the synchrotron radiation center of Shanghai light source. Spin the prepared solution onto the plasma treated silicon wafer. The size is 1.5 cm×1.5cm. The grazing angle were selected at 0.12°-0.16°.

Film thickness is determined by Dektak 150 Step meter.

Electrochemical cyclic voltammetry (*C-V*) was measured by electrochemical workstation.

Contact angles are measured by the contact angle measuring instrument CSCDIC-200S.

Depth-dependent absorption spectra of the PPHJ active layers: The preparation of the active layer is the same as that of rigid devices.

In-situ stress-strain test (Adv. Energy Mater. 2022, 12, 2201614): For the tensile testing specimen, the active layers were blade-coated onto the PEDOT:PSS/glass substrate. To float the layers on the water surface, water was allowed to penetrate into the PEDOT:PSS layer. Subsequently, PEDOT:PSS was dissolved, and the active layer was delaminated from the glass substrate. By performing this process at the water surface, the floating active layer specimen could be obtained. The active layer specimen with a size of 2.54×0.5 cm was prepared by using a cutting plotter. The tensile test was performed by a linear stage with a strain rate of 1 μm/s. During the tensile test, stress and strain data were obtained through a load cell (Istron-3300, US) and a digital image correlation device. The corresponding test program is Bluehill Lite software. Elongation at break (%) =  $L1$  (tensile length of sample)/ $L$  (effective length of sample) \* 100%. The schematic diagram of stretching instrument and stretching process is as follows:

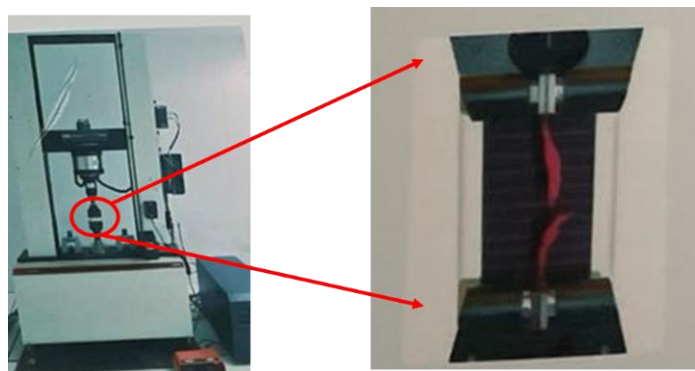

Mechanical stability tests: The mechanical stability tests were carried out in high purity nitrogen in the laboratory glove box. The performance test data of flexible devices are obtained at a set speed of 2 times/s under cylinders with different curvature. (Please note that the bending rate has a great impact on the performance of the device, and ignore the attenuation of devices in a short time)

## 5. Supplementary Figures and Tables

### 5.1 Supplementary Figures

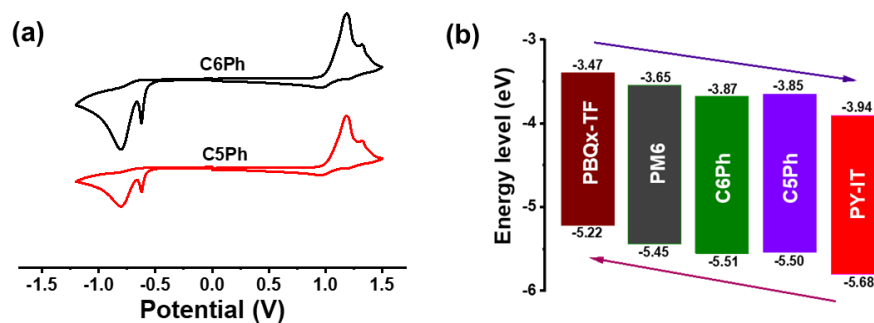

**Fig. S1** (a) The C-V plots of C6Ph and C5Ph; (b) Schematic diagram of energy levels for all materials.

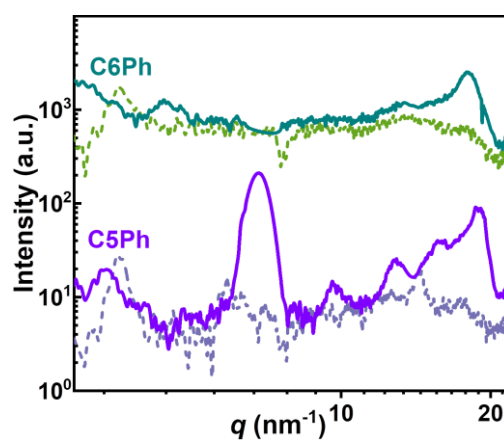

**Fig. S2** The line-cut profiles of C6Ph and C5Ph neat films based on GIWAXS studies.

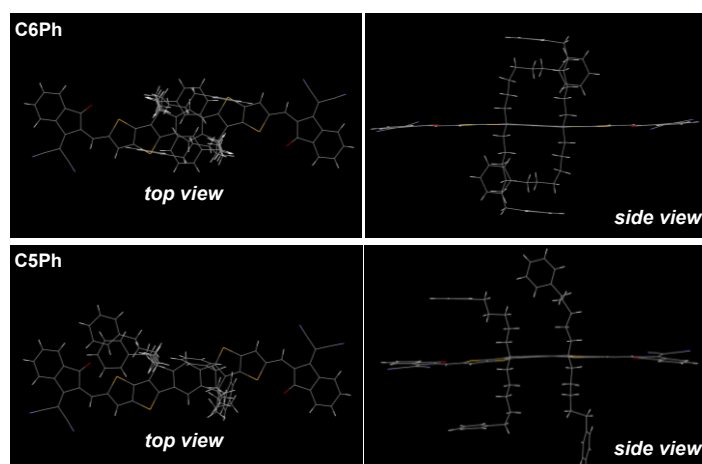

**Fig. S3** The molecular conformations of C6Ph and C5Ph in single crystals.

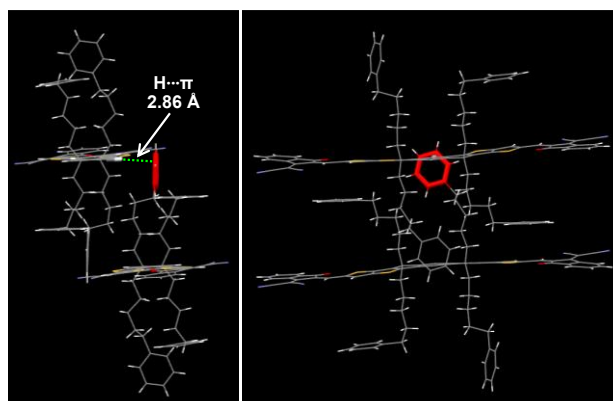

**Fig. S4** The short distance H $\cdots$  $\pi$  interaction between the hydrogen atom of C5Ph<sub>(1)</sub> skeleton and the distal phenyl  $\pi$ -plane of C5Ph<sub>(0)</sub>.

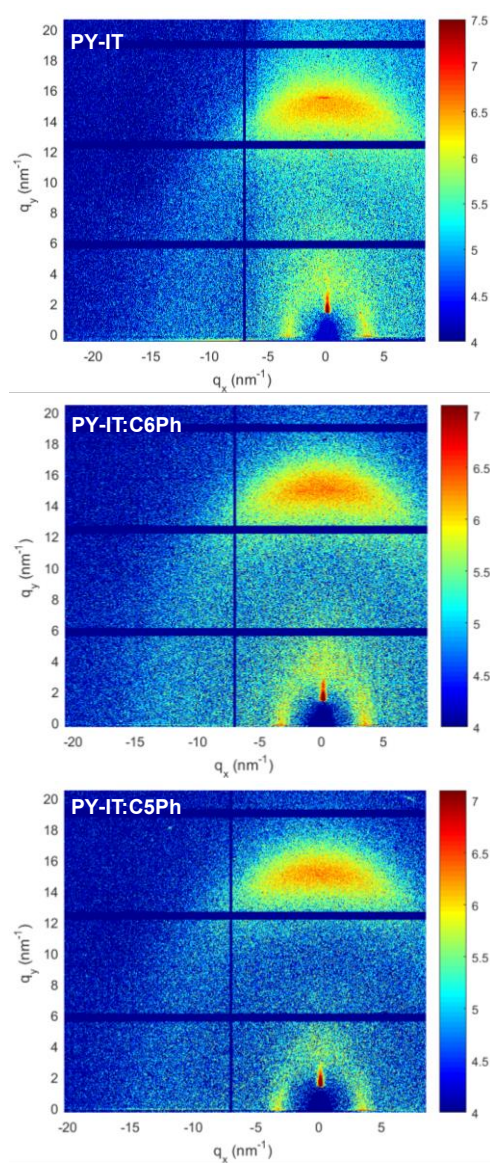

**Fig. S5** 2D-GIWAXS patterns of PY-IT, PY-IT:C6Ph, and PY-IT:C5Ph. The weight ratios for PY-IT and the C6Ph or C5Ph are 1.2:0.1.



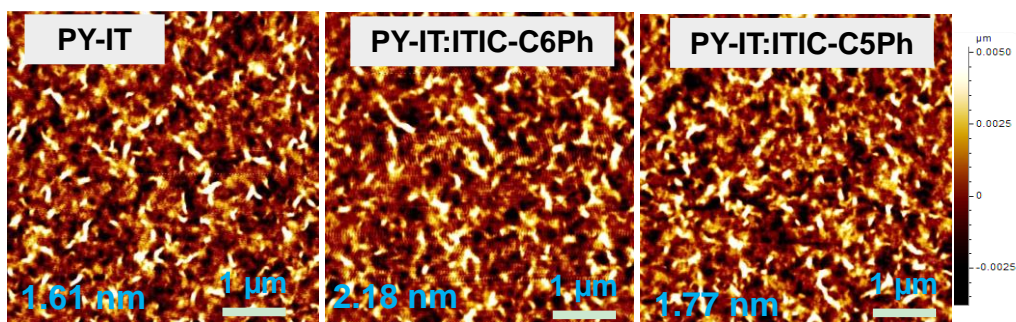

**Fig. S6** AFM images of PY-IT, PY-IT:C6Ph, and PY-IT:C5Ph. The weight ratios for PY-IT and the C6Ph or C5Ph are 1.2:0.1. The inserted numbers are on behalf of the RMS values.

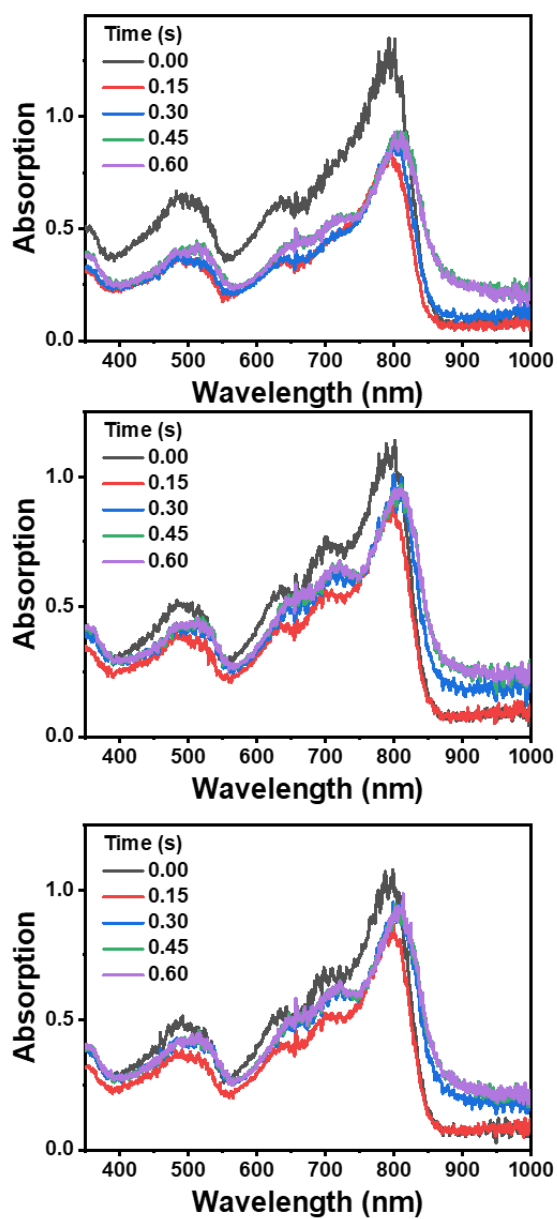

**Fig. S7** The in-suit absorption spectra of PY-IT, PY-IT:C6Ph, and PY-IT:C5Ph. The weight ratios for PY-IT and the C6Ph or C5Ph are 1.2:0.1.

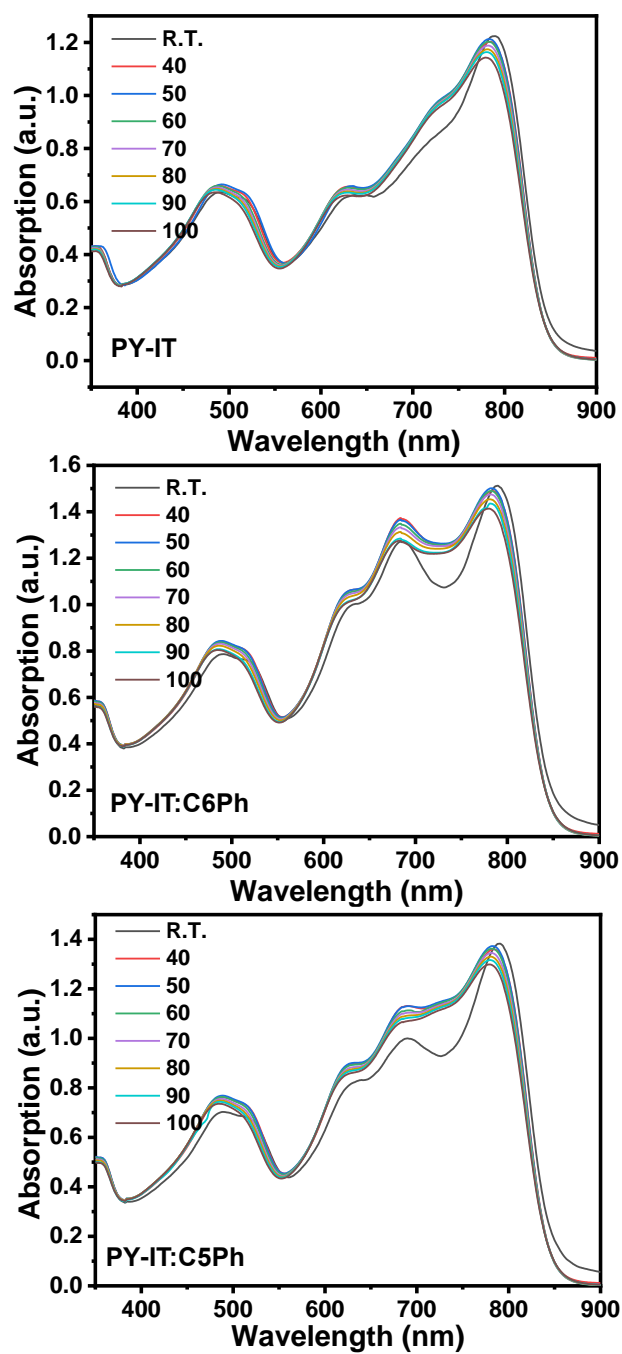

**Fig. S8** The absorption spectra of PY-IT, PY-IT:C6Ph, and PY-IT:C5Ph in dilute chlorobenzene solutions with temperature dependence.

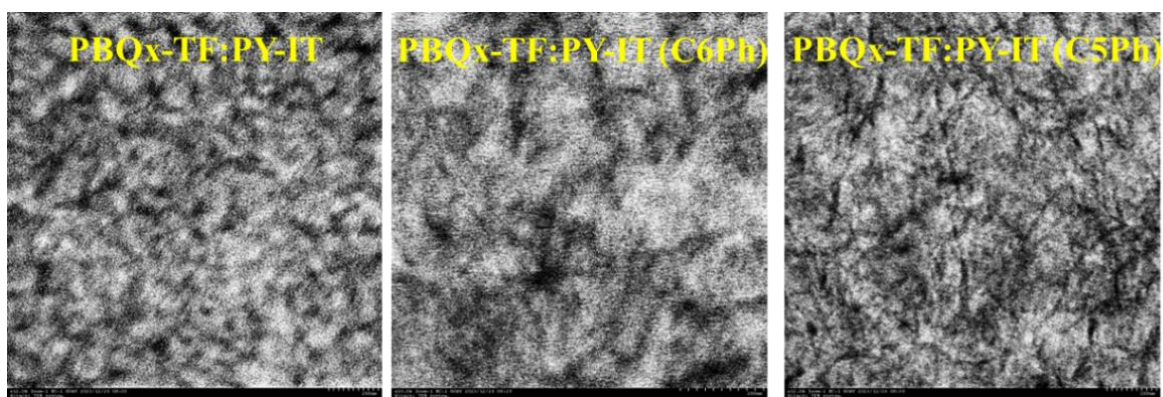

**Fig. S9** TEM images of PBQx-TF:PY-IT, PBQx-TF:PY-IT (C6Ph) and PBQx-TF:PY-IT (C5Ph) blend films.

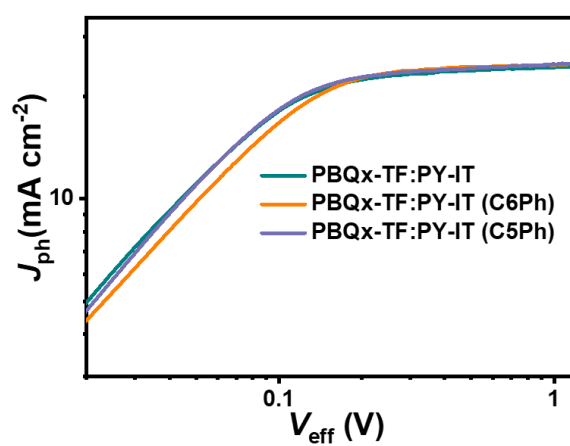

**Fig. S10** The photocurrent density ( $J_{ph}$ ) versus effective voltage ( $V_{eff}$ ) curves of PBQx-TF:PY-IT, PBQx-TF:PY-IT (C6Ph) and PBQx-TF:PY-IT (C5Ph) based all-PSCs.

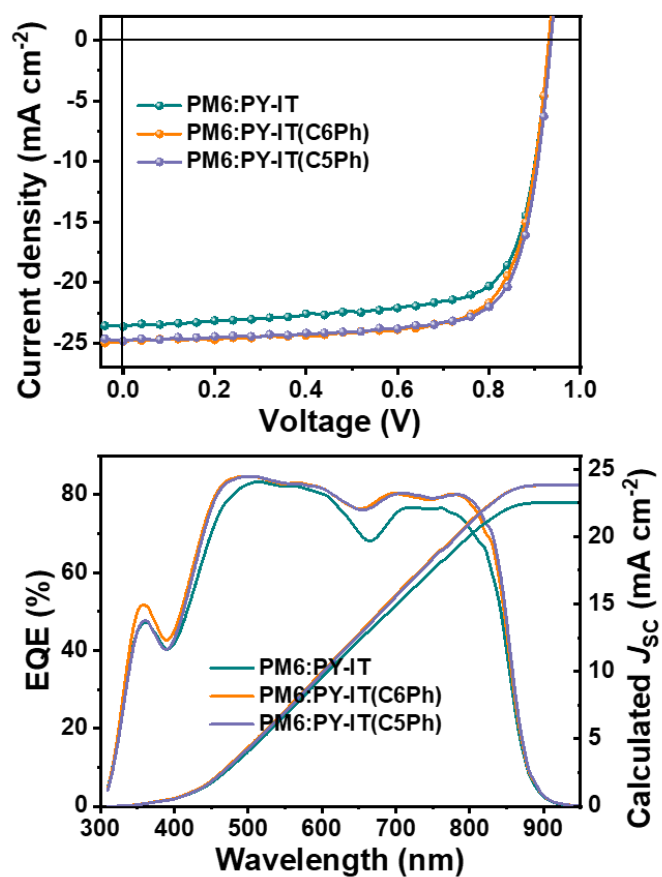

**Fig. S11** Optimal  $J$ - $V$  and EQE plots of PM6:PY-IT, PM6:PY-IT(C6Ph) and PM6:PY-IT(C5Ph) based all-PSCs.

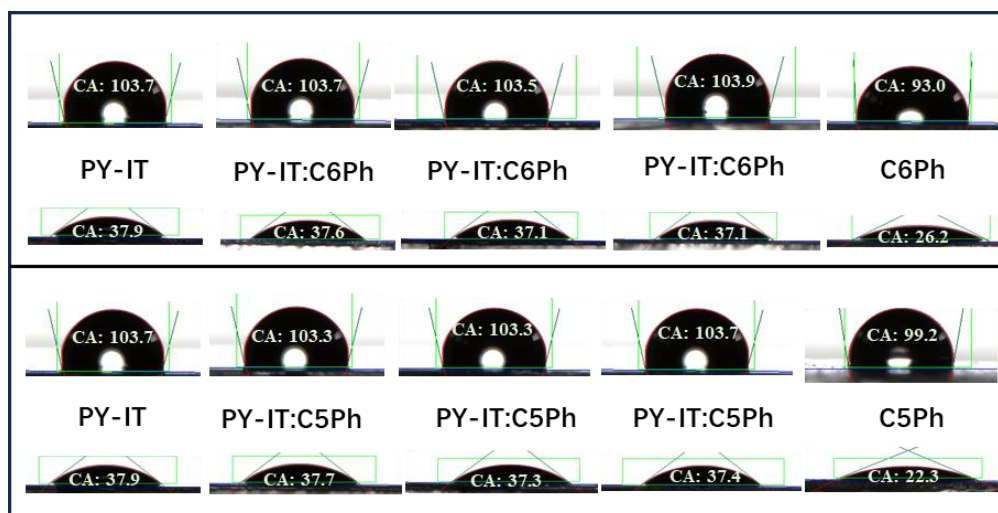

**Fig. S12** Contact Angle images of the neat films and small molecular doped films.

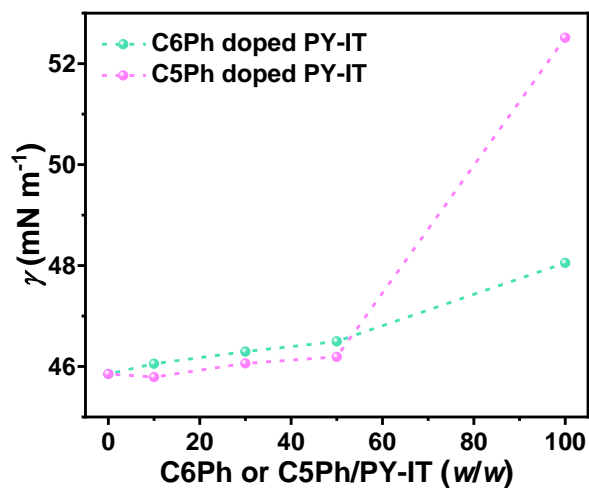

**Fig. S13** Evolutions of surface energies of acceptor blends doping with small molecules with different contents.

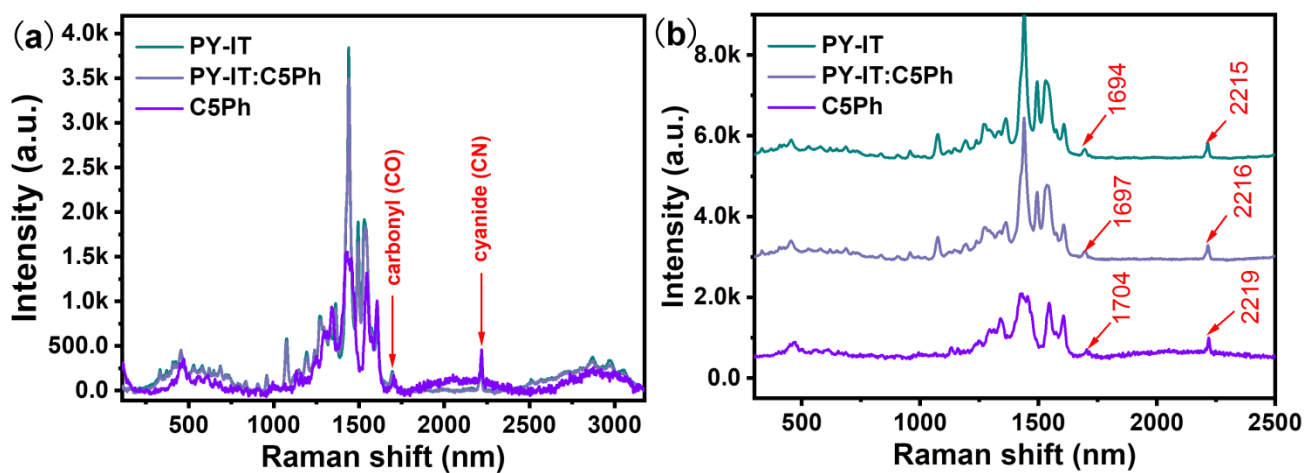

**Fig. S14** The Raman spectroscopy of PY-IT, C5Ph, and PY-IT:C5Ph (1.2:0.1) films.

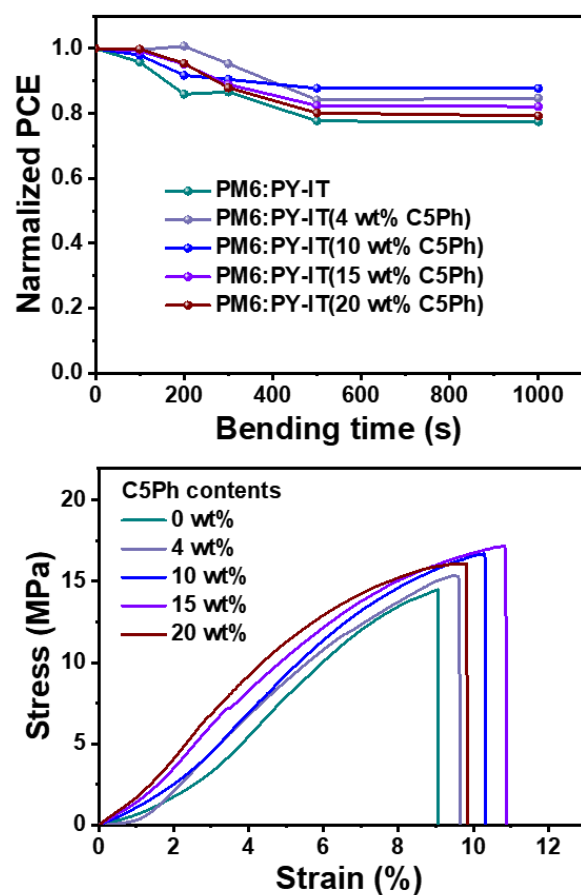

**Fig. S15** The bending stability (average values from five devices) and stress-strain curves as for PM6:PY-IT based flexible devices and active layers with different C5Ph contents.

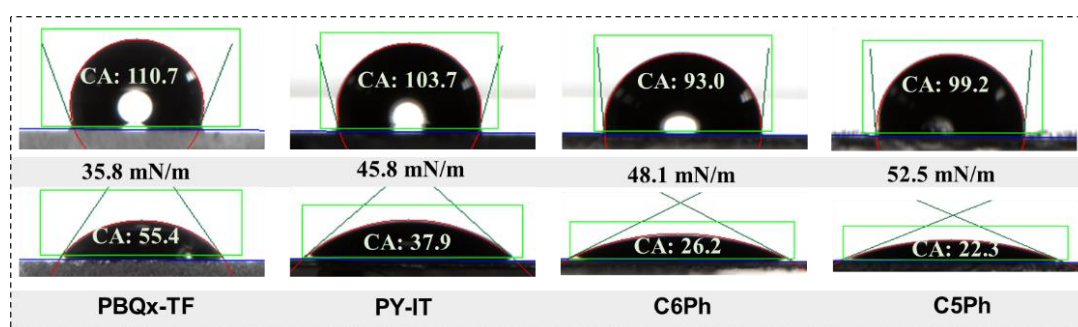

**Fig. S16** Contact Angle images of PBQx-TF, PY-IT, and small molecules.

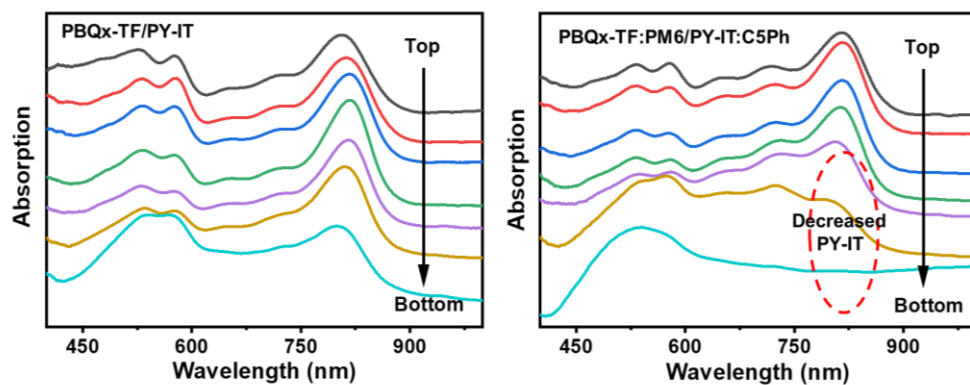

**Fig. S17** Depth-dependent absorption spectra of the PPHJ active layers.

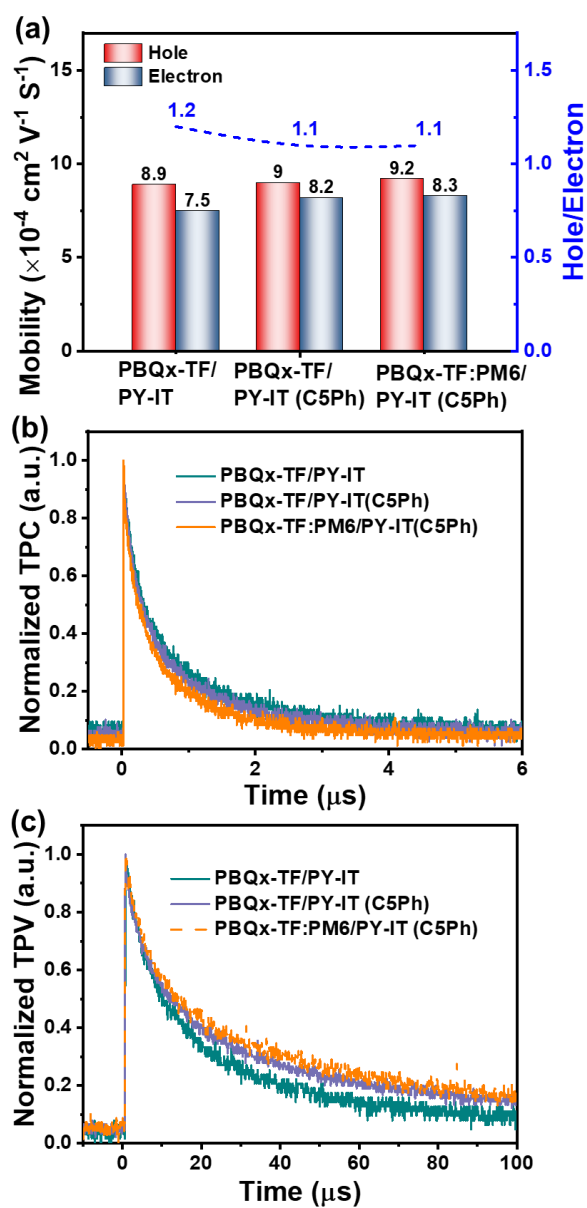

**Fig. S18** (a) Hole and electron mobility obtained through SCLC method; TPC (b) and TPV (c) decays of the PBQx-TF/PY-IT, PBQx-TF/PY-IT (C5Ph) and PBQx-TF:PM6/PY-IT (C5Ph) based all-PSCs.

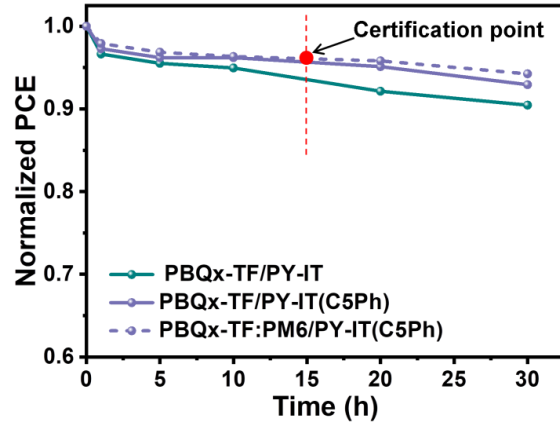

**Fig. S19** The storage stability measurements of the encapsulated devices (average values from five devices).

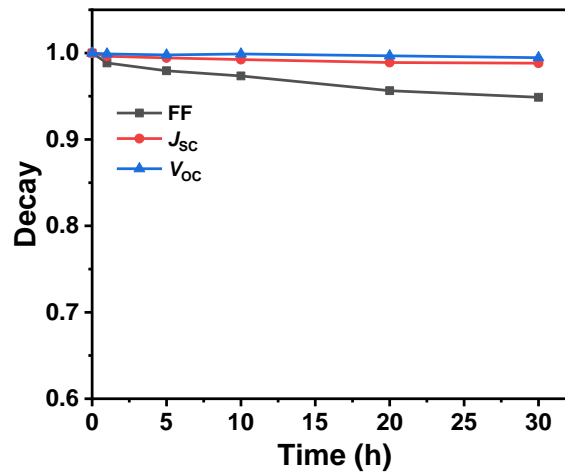

**Fig. S20** The decay plots of FF,  $J_{sc}$ , and FF of the PBQx-TF:PM6/PY-IT (C5Ph) device under storage (average values from five devices).



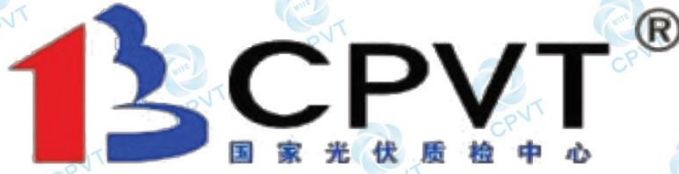

# 检验检测报告 TEST REPORT

No: 2024DMCS20003

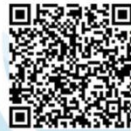

无锡检验

|                    |                                                                                                                  |
|--------------------|------------------------------------------------------------------------------------------------------------------|
| 产品名称<br>SAMPLE     | 有机太阳能电池器件<br>Organic Solar Cells                                                                                 |
| 规格型号<br>MODEL/TYPE | 有机太阳能电池<br>Organic Solar Cells                                                                                   |
| 委托单位<br>APPLICANT  | 中国科学院青岛生物能源与过程研究所<br>Qingdao Institute of Bioenergy and<br>bioprocess Technology, Chinese<br>Academy of Sciences |

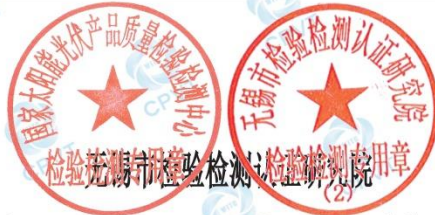

Wuxi Institute of Inspection, Testing and Certification

国家太阳能光伏产品质量检验检测中心

National Center of Inspection on Solar Photovoltaic Products Quality

## 注 意 事 项

- 1、检验检测报告未加盖检验检测专用章无效。
- 2、复制本报告未重新加盖检验检测专用章无效。
- 3、检验检测报告无主检、审核、批准人签字无效。
- 4、报告涂改无效。
- 5、对本报告若有异议，请在收到报告之日起15日内向本机构提出，逾期不予受理。
- 6、送检样品及客户信息均由客户提供，本机构不对其正确性负责。
- 7、本报告仅对被测样品负责。
- 8、如需符合性判定，但客户、法规或规范性文件未规定判定规则，则按 RB/T197-2015《检测和校准结果及与规范符合性的报告指南》判定。如无特别说明，符合性报告基于包含概率约为95%的扩展不确定度。
- 9、未加盖资质认定标志（CMA）的报告仅作为科研、教学或内部质量控制之用。
- 10、如需查验报告真伪，可直接扫描封面页二维码后进行查询，或登陆无锡市检验检测认证研究院网站——网址：["https://www.wxzjs.com"](https://www.wxzjs.com)-报告查询-新版查询入口，通过输入下方“报告验证码”获取报告信息。
- 11、如需查验电子版报告（仅限原版PDF文档）是否已被非法篡改，需使用Adobe Acrobat Reader打开后点击签章，查看提示内容以确定报告是否已被篡改。

## ATTENTION

- 1.The report is invalid without the special test seal of the institution.
- 2.Duplication of the report is invalid without the special test seal.
- 3.The test report is invalid without the signature of main tester,reviewer and approver.
- 4.The report is invalid if altered,added or deleted.
- 5.If opposing to this test report,any party concerned can bring forth an opposition within 15 days after receiving of this report,and it will not be accepted after the specified date.
- 6.The submitted samples and related information are provided by the customer. This institution is not responsible for its correctness.
- 7.The results apply only to the samples received.
- 8.When a statement of conformity is required. the statement be handled according to standard RB/T197-2015,Guide on stating test and calibration results and compliance with specification. Unless the rule have been prescribed by customers,regulations or normative documents.Unless otherwise stated,the compliance report is based on an extended uncertainty with a probability of approximately 95%.
9. The report without CMA is only used for scientific research, teaching or internal quality control.
- 10.If you need to check the authenticity of the report, you can directly scan the QR code on the cover page,or log on the website "<https://www.wxzjs.com>"-报告查询-新版查询入口,and enter the report verification code for checking.
- 11.If you want to check the authenticity of the electronic report (only original PDF electronic report),you need to use Adobe Acrobat Reader to open it and click on the signature to check if the document has been modified.

无锡市检验检测认证研究院

Wuxi Institute of Inspection, Testing and Certification

国家太阳能光伏产品质量检验检测中心

National Center of Inspection on Solar Photovoltaic Products Quality

检验机构地址：江苏省无锡市锡山区东亭春新东路8号/新吴区新华路5号

Add.: No.8 Chunxin East Road,Dongting,Xishan District, Wuxi,Jiangsu / No.5 Xinhua Road,Xinwu District,Wuxi, Jiangsu

检验机构邮编:214101/214028

检验机构业务电话（含区号）:0510-88216036/88226615/88208722

检验机构传真(含区号): 0510-88226615/88209373 检验机构E-mail:wxt@wxz.js.com

报告验证码: 85261561



无锡市检验检测认证研究院  
Wuxi Institute of Inspection, Testing and Certification  
国家太阳能光伏产品质量检验检测中心  
National Center of Inspection on Solar Photovoltaic Products Quality

检验检测报告  
TEST REPORT

No: 2024DMCS20003

共 6 页第 1 页 page 1 of 6

|                                                  |                                                                                                                                                                                            |                                                                                                                                                                                                                        |                                            |
|--------------------------------------------------|--------------------------------------------------------------------------------------------------------------------------------------------------------------------------------------------|------------------------------------------------------------------------------------------------------------------------------------------------------------------------------------------------------------------------|--------------------------------------------|
| 产品名称<br>Sample Description                       | 有机太阳能电池器件<br>Organic Solar Cells                                                                                                                                                           | 规格型号<br>Model/Type                                                                                                                                                                                                     | 有机太阳能电池<br>Organic Solar Cells             |
|                                                  |                                                                                                                                                                                            | 商 标<br>Trade Mark                                                                                                                                                                                                      | --<br>--                                   |
| 标称生产单位<br>Nominal Producer                       | --<br>--                                                                                                                                                                                   |                                                                                                                                                                                                                        |                                            |
| 委托单位名称\地址\邮编<br>Applicant Name<br>\Add. \P. C.   | 中国科学院青岛生物能源与过程研究所\中国青岛市崂山区松岭路 189 号\--<br>Qingdao Institute of Bioenergy and bioprocess Technology, Chinese Academy of Sciences\No. 189 Songling Road, Laoshan District, Qingdao, China\-- |                                                                                                                                                                                                                        |                                            |
| 样品数量<br>Sample Quantity                          | 1 片<br>1 piece                                                                                                                                                                             | 样品状态<br>Condition of Sample                                                                                                                                                                                            | 符合检验要求<br>Comply with testing requirements |
| 标称生产日期/批号<br>Nominal Date of Production /Lot No. | --/--                                                                                                                                                                                      | 样品接收日期<br>Date of Sample Receiving                                                                                                                                                                                     | 2024-01-08                                 |
| 检验检测日期<br>Testing Date(s)                        | 2024-01-08                                                                                                                                                                                 | 检验检测地点<br>Testing Location                                                                                                                                                                                             | 本机构·新华路<br>CPVT·Xinhua Road                |
| 检验检测依据<br>Test In Accordance With                | IEC 60904-1:2020 Photovoltaic devices - Part 1: Measurement of photovoltaic current-voltage characteristics                                                                                |                                                                                                                                                                                                                        |                                            |
| 判定依据<br>Decide In Accordance With                | 国家光伏质检中心<br>--                                                                                                                                                                             |                                                                                                                                                                                                                        |                                            |
| 检验结论<br>Conclusion                               | --<br>--                                                                                                                                                                                   |  <br>签发日期: 2024-01-15<br>检验检测专用章<br>检验检测专用章 (2) |                                            |
| 备 注:<br>Remarks:                                 | --<br>--                                                                                                                                                                                   |                                                                                                                                                                                                                        |                                            |

批准: 怀朝君  
Approved by  
怀朝君

审核: 林皓  
Reviewed by  
林皓

主检: 吕首首  
Tested by  
吕首首

### 样品描述 Sample Description

|                                        |                                        |                                |
|----------------------------------------|----------------------------------------|--------------------------------|
| 电池片<br>描述<br>Solar Cell<br>Description | 产品型号<br>Product model                  | 有机太阳能电池<br>Organic Solar Cells |
|                                        | 电池片长 (mm)<br>Length of solar cell (mm) | —                              |
|                                        | 电池片宽 (mm)<br>Width of solar cell (mm)  | —                              |
|                                        | 电池片类型<br>Solar cell type               | 其他<br>Others                   |
| 备注: —<br>Remark: —                     |                                        |                                |

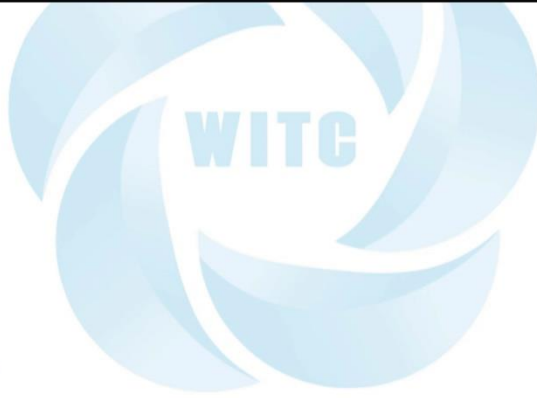

**CPV T**  
国家光伏质检中心

无锡检研

检  
研  
产  
品  
检  
测

## 检 验 检 测 结 果

### Test Results

| 序号<br>Clause | 检验项目<br>Test item(s)                                                           | 单位<br>Unit | 技术要求<br>Technical requirements                                                                                                                                                                                                                                                                                                                                      | 结果<br>Results | 单项评价<br>Verdict<br>Pass/Fail |
|--------------|--------------------------------------------------------------------------------|------------|---------------------------------------------------------------------------------------------------------------------------------------------------------------------------------------------------------------------------------------------------------------------------------------------------------------------------------------------------------------------|---------------|------------------------------|
| 1            | 电流-电压特性的测量<br>(1#)<br>Current-voltage<br>characteristic<br>measurement<br>(1#) | —          | 在标准试验条件下（样品温度：<br>25℃，辐照度：1000W/m <sup>2</sup> ，标准<br>太阳光谱辐照分布符合 IEC<br>60904-3 规定），测量样品随负荷<br>变化的电流-电压特性。<br>At STC (module temperature: 25℃,<br>irradiance: 1000W/m <sup>2</sup> , standard solar<br>spectral irradiance distribution<br>corresponds to IEC60904-3),<br>measure the current-voltage<br>characteristics of the cell with the<br>variation of load. | —             | —                            |
| 1.1          | 开路电压 Voc<br>Open-circuit voltage, Voc                                          | V          | —                                                                                                                                                                                                                                                                                                                                                                   | 0.9200        | —                            |
| 1.2          | 短路电流 Isc<br>Short-circuit current, Isc                                         | mA         | —                                                                                                                                                                                                                                                                                                                                                                   | 2.592         | —                            |
| 1.3          | 最大功率 Pmax<br>Maximum-power, Pmax                                               | mW         | —                                                                                                                                                                                                                                                                                                                                                                   | 1.795         | —                            |
| 1.4          | 最大功率点电压 Vmp<br>Maximum-power voltage,<br>Vmp                                   | V          | —                                                                                                                                                                                                                                                                                                                                                                   | 0.7799        | —                            |
| 1.5          | 最大功率点电流 Imp<br>Maximum-power current,<br>Imp                                   | mA         | —                                                                                                                                                                                                                                                                                                                                                                   | 2.301         | —                            |
| 1.6          | 填充因子 FF, %<br>Fill factor FF, %                                                | —          | —                                                                                                                                                                                                                                                                                                                                                                   | 75.27         | —                            |
| 1.7          | 转换效率 η, %<br>Conversion efficiency η, %                                        | —          | $\eta = \frac{P_{max}}{1000W/m^2 \times S} \times 100\%$ S 为样品面积/Sample area                                                                                                                                                                                                                                                                                        | 18.20         | —                            |

备注：样品面积 S 为样品活性区域所确定的面积，S=0.099cm<sup>2</sup>  
 Remark: Sample area S is determined by the active area of the sample, S=0.099cm<sup>2</sup>  
 扫描方向从-0.2V~1.2V，步长为 0.014V。  
 Sweep direction: -0.2V~1.2V, sweep steps: 0.014V.

### 检验检测结果

#### Test Results

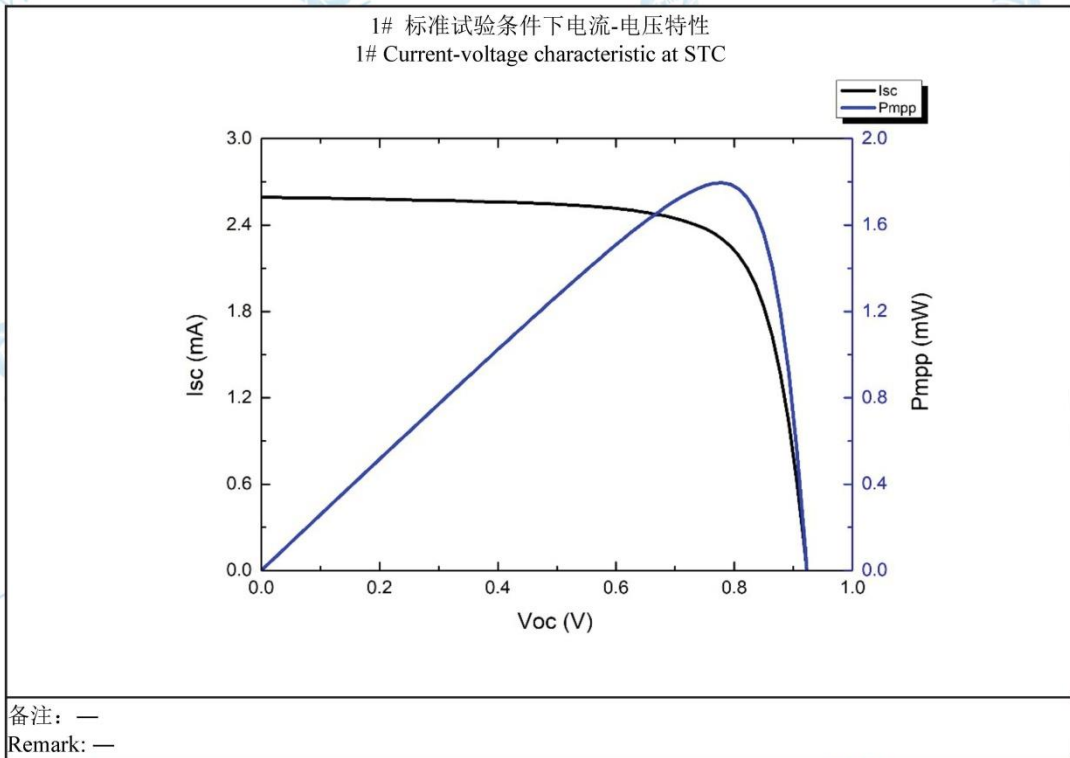

**CPVT**  
国家光伏质检中心

**Fig. S21** The certification report from CPVT, China, as for PBQx-TF:PM6/PY-IT (C5Ph) device (after 15 hours of device preparation).



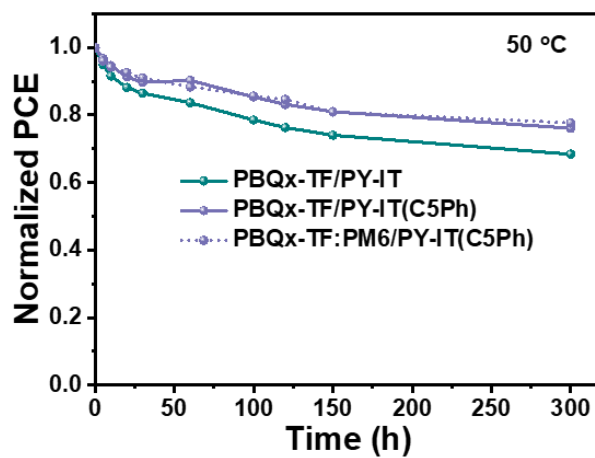

**Fig. S22** Thermal stability of the all-PSCs under continuous annealing at 50 °C (average values from five devices).

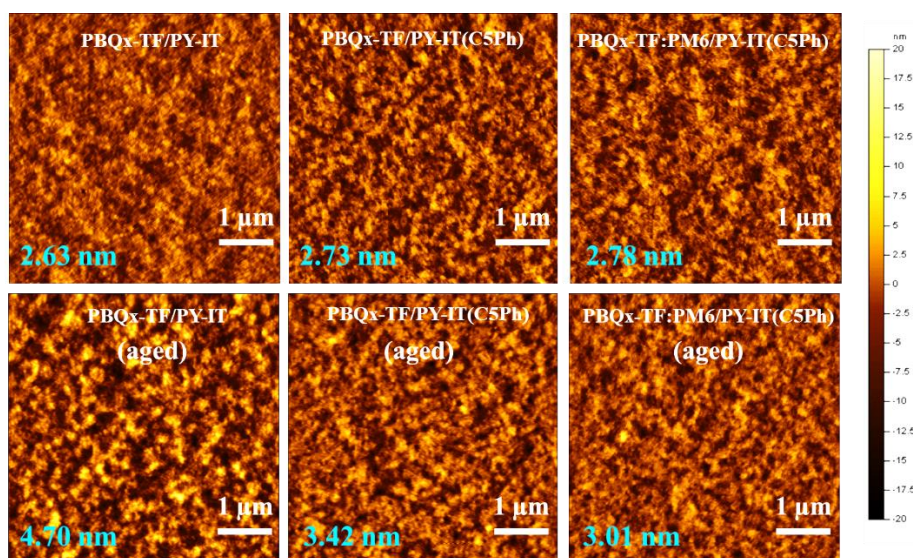

**Fig. S23** AFM images of PBQx-TF/PY-IT, PBQx-TF/PY-IT (C5Ph) and PBQx-TF:PM6/PY-IT (C5Ph) films (fresh and aged for 30 hrs under continuous annealing at 50 °C) in glove box.

## 5.2 Supplementary Tables

**Table S1** GIWAXS data of C6Ph and C5Ph neat films.

| SMA  | IP                        |                              | OOP                       |                           |                           |                              |
|------|---------------------------|------------------------------|---------------------------|---------------------------|---------------------------|------------------------------|
|      | (100)<br>nm <sup>-1</sup> | <i>d</i> <sub>100</sub><br>Å | (100)<br>nm <sup>-1</sup> | (200)<br>nm <sup>-1</sup> | (010)<br>nm <sup>-1</sup> | <i>d</i> <sub>010</sub><br>Å |
| C6Ph | 3.57                      | 17.60                        | -                         | -                         | 18.06                     | 3.48                         |
| C5Ph | 3.58                      | 17.55                        | 3.43                      | 6.85                      | 18.99                     | 3.31                         |

**Table S2** Crystal data and structure refinement for C6Ph.

|                                                               |                                                                                                |
|---------------------------------------------------------------|------------------------------------------------------------------------------------------------|
| CCDC number                                                   | 2208806                                                                                        |
| Empirical formula                                             | C <sub>100</sub> H <sub>88</sub> Cl <sub>18</sub> N <sub>4</sub> O <sub>2</sub> S <sub>4</sub> |
| Formula weight                                                | 2144.08                                                                                        |
| Temperature/K                                                 | 169.99(14)                                                                                     |
| Crystal system                                                | triclinic                                                                                      |
| Space group                                                   | P-1                                                                                            |
| <i>a</i> /Å                                                   | 9.8123(6)                                                                                      |
| <i>b</i> /Å                                                   | 15.5877(7)                                                                                     |
| <i>c</i> /Å                                                   | 18.3125(5)                                                                                     |
| $\alpha$ /°                                                   | 71.984(4)                                                                                      |
| $\beta$ /°                                                    | 77.751(4)                                                                                      |
| $\gamma$ /°                                                   | 71.930(5)                                                                                      |
| Volume/Å <sup>3</sup>                                         | 2511.2(2)                                                                                      |
| <i>Z</i>                                                      | 1                                                                                              |
| $\rho_{\text{calc}}$ /cm <sup>3</sup>                         | 1.418                                                                                          |
| $\mu$ /mm <sup>-1</sup>                                       | 5.676                                                                                          |
| F(000)                                                        | 1102.0                                                                                         |
| Crystal size/mm <sup>3</sup>                                  | 0.28 × 0.15 × 0.02                                                                             |
| Radiation                                                     | Cu K $\alpha$ ( $\lambda$ = 1.54184)                                                           |
| 2 $\Theta$ range for data collection/°                        | 6.916 to 171.524                                                                               |
| Index ranges                                                  | -12 ≤ <i>h</i> ≤ 12, -19 ≤ <i>k</i> ≤ 19, -22 ≤ <i>l</i> ≤ 23                                  |
| Reflections collected                                         | 75394                                                                                          |
| Independent reflections                                       | 9976 [ <i>R</i> <sub>int</sub> = 0.1639, <i>R</i> <sub>sigma</sub> = 0.0648]                   |
| Data/restraints/parameters                                    | 9976/0/587                                                                                     |
| Goodness-of-fit on <i>F</i> <sup>2</sup>                      | 2.003                                                                                          |
| Final <i>R</i> indexes [ <i>I</i> >= 2 $\sigma$ ( <i>I</i> )] | <i>R</i> <sub>1</sub> = 0.1351, <i>wR</i> <sub>2</sub> = 0.3286                                |
| Final <i>R</i> indexes [all data]                             | <i>R</i> <sub>1</sub> = 0.1749, <i>wR</i> <sub>2</sub> = 0.3474                                |
| Largest diff. peak/hole / e Å <sup>-3</sup>                   | 0.91/-0.94                                                                                     |



**Table S3** Crystal data and structure refinement for C5Ph.

|                                             |                                                                                             |
|---------------------------------------------|---------------------------------------------------------------------------------------------|
| CCDC number                                 | 2299831                                                                                     |
| Empirical formula                           | C <sub>9</sub> H <sub>7</sub> Cl <sub>12</sub> N <sub>4</sub> O <sub>2</sub> S <sub>4</sub> |
| Formula weight                              | 1849.24                                                                                     |
| Temperature/K                               | 169.98(10)                                                                                  |
| Crystal system                              | triclinic                                                                                   |
| Space group                                 | P-1                                                                                         |
| a/Å                                         | 10.70790(10)                                                                                |
| b/Å                                         | 19.7519(2)                                                                                  |
| c/Å                                         | 21.8828(2)                                                                                  |
| α/°                                         | 75.6190(10)                                                                                 |
| β/°                                         | 85.3700(10)                                                                                 |
| γ/°                                         | 82.8160(10)                                                                                 |
| Volume/Å <sup>3</sup>                       | 4442.08(8)                                                                                  |
| Z                                           | 2                                                                                           |
| ρ <sub>calc</sub> /g/cm <sup>3</sup>        | 1.383                                                                                       |
| μ/mm <sup>-1</sup>                          | 4.708                                                                                       |
| F(000)                                      | 1908.0                                                                                      |
| Crystal size/mm <sup>3</sup>                | 0.3 × 0.15 × 0.05                                                                           |
| Radiation                                   | Cu Kα (λ = 1.54184)                                                                         |
| 2θ range for data collection/°              | 4.174 to 151.334                                                                            |
| Index ranges                                | -13 ≤ h ≤ 12, -24 ≤ k ≤ 24, -27 ≤ l ≤ 26                                                    |
| Reflections collected                       | 62824                                                                                       |
| Independent reflections                     | 17871 [R <sub>int</sub> = 0.0346, R <sub>sigma</sub> = 0.0310]                              |
| Data/restraints/parameters                  | 17871/1/1073                                                                                |
| Goodness-of-fit on F <sup>2</sup>           | 1.062                                                                                       |
| Final R indexes [I ≥ 2σ (I)]                | R <sub>1</sub> = 0.0461, wR <sub>2</sub> = 0.1235                                           |
| Final R indexes [all data]                  | R <sub>1</sub> = 0.0522, wR <sub>2</sub> = 0.1286                                           |
| Largest diff. peak/hole / e Å <sup>-3</sup> | 1.25/-0.77                                                                                  |

**Table S4** GIWAXS data of PBQ<sub>x</sub>-TF:PY-IT, PBQ<sub>x</sub>-TF:PY-IT (C6Ph), and PBQ<sub>x</sub>-TF:PY-IT (C5Ph) active layers.

| Active layer <sup>a</sup>         | IP                        |                       | OOP                       |                       |                           |                       |
|-----------------------------------|---------------------------|-----------------------|---------------------------|-----------------------|---------------------------|-----------------------|
|                                   | (100)<br>nm <sup>-1</sup> | d <sub>100</sub><br>Å | (100)<br>nm <sup>-1</sup> | d <sub>100</sub><br>Å | (010)<br>nm <sup>-1</sup> | d <sub>010</sub><br>Å |
| PBQ <sub>x</sub> -TF:PY-IT        | 3.28                      | 19.16                 | 3.91                      | 16.07                 | 17.53                     | 3.58                  |
| PBQ <sub>x</sub> -TF:PY-IT (C6Ph) | 3.31                      | 18.98                 | 3.92                      | 16.03                 | 17.76                     | 3.54                  |
| PBQ <sub>x</sub> -TF:PY-IT (C5Ph) | 3.32                      | 18.93                 | 3.91                      | 16.07                 | 17.78                     | 3.53                  |

<sup>a</sup> The weight ratios of PBQ<sub>x</sub>-TF:PY-IT (C6Ph or C5Ph) are 1:1.2:0.1.

**Table S5** Photovoltaic parameters of rigid all-PSCs with different C6Ph or C5Ph contents.<sup>a</sup>

| Active layer<br>(PBQx-TF:PY-IT) | $V_{oc}$<br>(V)       | $J_{sc}$<br>(mA cm <sup>-2</sup> ) | FF<br>(%)             | PCE<br>(%)            |
|---------------------------------|-----------------------|------------------------------------|-----------------------|-----------------------|
| PBQx-TF:PY-IT                   | 0.920<br>(0.919±0.03) | 23.92<br>(23.85±0.25)              | 76.85<br>(76.52±0.52) | 16.91<br>(16.68±0.16) |
| PBQx-TF:PY-IT<br>(2 wt% C6Ph)   | 0.920<br>(0.920±0.03) | 24.27<br>(24.02±0.39)              | 77.24<br>(77.05±0.42) | 17.21<br>(17.05±0.21) |
| PBQx-TF:PY-IT<br>(4 wt% C6Ph)   | 0.921<br>(0.920±0.03) | 24.30<br>(24.12±0.22)              | 77.61<br>(77.21±0.48) | 17.37<br>(17.19±0.14) |
| PBQx-TF:PY-IT<br>(6 wt% C6Ph)   | 0.922<br>(0.921±0.03) | 24.23<br>(24.20±0.21)              | 77.32<br>(77.14±0.31) | 17.28<br>(17.11±0.17) |
| PBQx-TF:C6Ph                    | 0.929<br>(0.928±0.03) | 16.72<br>(16.55±0.23)              | 75.19<br>(74.89±0.52) | 11.67<br>(11.52±0.26) |
| PBQx-TF:PY-IT<br>(2 wt% C5Ph)   | 0.920<br>(0.921±0.03) | 24.21<br>(24.01±0.24)              | 78.12<br>(77.77±0.51) | 17.41<br>(17.26±0.22) |
| PBQx-TF:PY-IT<br>(4 wt% C5Ph)   | 0.921<br>(0.921±0.04) | 24.68<br>(24.53±0.27)              | 79.25<br>(78.45±0.62) | 18.02<br>(17.81±0.16) |
| PBQx-TF:PY-IT<br>(6 wt% C5Ph)   | 0.923<br>(0.922±0.04) | 24.64<br>(24.50±0.31)              | 78.56<br>(78.16±0.45) | 17.86<br>(17.53±0.19) |
| PBQx-TF:C5Ph                    | 0.932<br>(0.920±0.03) | 16.56<br>(16.41±0.19)              | 77.22<br>(76.89±0.46) | 11.92<br>(11.76±0.21) |

<sup>a</sup> Average parameters with standard deviations obtained from ten devices.

**Table S6** The exciton/charge parameters of all-PSCs.

| Active layer         | $\tau$ (ps) | $P_{diss}$ (%) | $P_{coll}$ (%) | $\tau_{ext}$ ( $\mu$ s) | $\tau_{rec}$ ( $\mu$ s) | $n_{trap}$ ( $10^{16}$ cm <sup>-3</sup> ) |
|----------------------|-------------|----------------|----------------|-------------------------|-------------------------|-------------------------------------------|
| PBQx-TF:PY-IT        | 185         | 98.1           | 85.5           | 3.22                    | 15.7                    | 0.85                                      |
| PBQx-TF:PY-IT (C6Ph) | 118         | 98.6           | 87.1           | 2.18                    | 16.1                    | 0.72                                      |
| PBQx-TF:PY-IT (C5Ph) | 108         | 99.0           | 88.2           | 1.01                    | 22.9                    | 0.55                                      |

**Table S7** The parameters of elongation at break, toughness, elastic deformation, elastic modulus, and yield strength of blend films with different C5Ph contents.

| Blend films<br>(PBQx-TF:PY-IT) | Elongation at<br>break (%) | Toughness<br>(MPa) | Elastic<br>deformation (%) | Elastic modulus<br>(MPa) | yield strength (MPa) |
|--------------------------------|----------------------------|--------------------|----------------------------|--------------------------|----------------------|
| 0 wt% C5Ph                     | 9.80                       | 87.25              | 4.80                       | 242                      | 11.65                |
| 4 wt% C5Ph                     | 10.54                      | 108.97             | 5.37                       | 246                      | 13.24                |
| 10 wt% C5Ph                    | 11.61                      | 137.07             | 6.06                       | 247                      | 14.98                |
| 15 wt% C5Ph                    | 12.37                      | 163.67             | 5.14                       | 273                      | 14.04                |
| 20 wt% C5Ph                    | 11.02                      | 135.14             | 4.86                       | 265                      | 12.87                |
